# Supplementary material for: Use of Opuntia ficus-indica Fruit Peel as a Novel Source of Mucilage with Coagulant Physicochemical/Molecular Characteristics
Source: MDPI journal article supplement (doi:10.3390/polym14183832), 2022-09-14
Supplement: s1 [file s1]

## Supplementary Materials

# Use of *Opuntia ficus-indica* fruit peel as a novel source of mucilage with coagulant physicochemical/molecular

Maria Carolina Otálora <sup>1,\*</sup>, Andrea Wilches-Torres <sup>1</sup>, Carlos Rafael Lara <sup>2</sup>, Gabriel Ricardo Cifuentes <sup>2</sup>  
and Jovanny A. Gómez Castaño <sup>3,\*</sup>

<sup>1</sup> Grupo de Investigación en Ciencias Básicas (NÚCLEO), Facultad de Ciencias e Ingeniería, Universidad de Boyacá, Tunja 050030, Colombia

<sup>2</sup> Grupo Gestión de Recursos Hídrico, Facultad de Ciencias e Ingeniería, Universidad de Boyacá, Tunja 050030, Colombia

<sup>3</sup> Grupo Química-Física Molecular y Modelamiento Computacional (QUIMOL<sup>®</sup>), Escuela de Ciencias Químicas, Universidad Pedagógica y Tecnológica de Colombia, Sede Tunja, Avenida Central del Norte, Tunja 050030, Colombia

\* Correspondence: marotalora@uniboyaca.co (M.C.O); jovanny.gomez@uptc.edu.co (J.A.G.C)

**Citation:** Otálora, M.C.; Wilches-Torres, A.; Lara, C.R.; Cifuentes, G.R.; ; Gómez Castaño, J.A. Use of *Opuntia ficus-indica* Fruit Peel as a Novel Source of Mucilage with Coagulant Physicochemical/Molecular Characteristics. *Polymers* **2022**, *14*, 3832. <https://doi.org/10.3390/polym14183832>

Academic Editor: Irshad Kammakakam and Mostafa Khodakarami

Received: 30 August 2022  
Accepted: 11 September 2022  
Published: 14 September 2022

**Publisher's Note:** MDPI stays neutral with regard to jurisdictional claims in published maps and institutional affiliations.

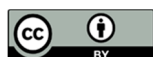

**Copyright:** © 2022 by the authors. Submitted for possible open access publication under the terms and conditions of the Creative Commons Attribution (CC BY) license (<https://creativecommons.org/licenses/by/4.0/>).

**Table S1.** [M+H]<sup>+</sup> ions masses of the main components of mucilage extracted from OFI fruit peels detected by UPLC-QTOF-MS.

| <b>R.T (min)</b> | <b>Relative %</b> | <b>[M+H]<sup>+</sup></b> | <b>Molecular formula</b>                                       | <b>Identification</b> | <b>Class</b>   |
|------------------|-------------------|--------------------------|----------------------------------------------------------------|-----------------------|----------------|
| 0.52             | 5.2               | 167.0178                 | C <sub>8</sub> H <sub>7</sub> O <sub>4</sub>                   | Hydroxybenzoic acid   | Polyphenol     |
| 0.56             | 14.1              | *                        | -                                                              | Biopolymer            | Polysaccharide |
| 0.58             | 3.9               | 383.1219                 | -                                                              | -                     | -              |
| 1.95             | 4.3               | 279.0549                 | C <sub>16</sub> H <sub>23</sub> O <sub>4</sub>                 | -                     | -              |
| 7.21             | 2.4               | 263.0602                 | -                                                              | -                     | -              |
| 8.05             | 1.5               | 371.2734                 | -                                                              | -                     | -              |
| 8.85             | 1.7               | 372.2556                 | -                                                              | -                     | -              |
| 9.13             | 0.6               | 457.3461                 | -                                                              | -                     | -              |
| 9.60             | 3.0               | 757.2263                 | -                                                              | -                     | -              |
| 9.68             | 3.4               | 453.3515                 | -                                                              | -                     | -              |
| 9.80             | 1.3               | 215.1806                 | -                                                              | -                     | -              |
| 10.1             | 1.6               | 598.4278                 | -                                                              | -                     | -              |
| 10.7             | 21.3              | 701.5020                 | C <sub>33</sub> H <sub>36</sub> N <sub>2</sub> O <sub>15</sub> | Betacyanin derivative | Betalain       |
| 15.6             | 33.5              | 290.2764                 | C <sub>15</sub> H <sub>14</sub> O <sub>6</sub>                 | Catechin              | Flavonoid      |

\* See Figure 3 and Table 1 in the main document for mass information.

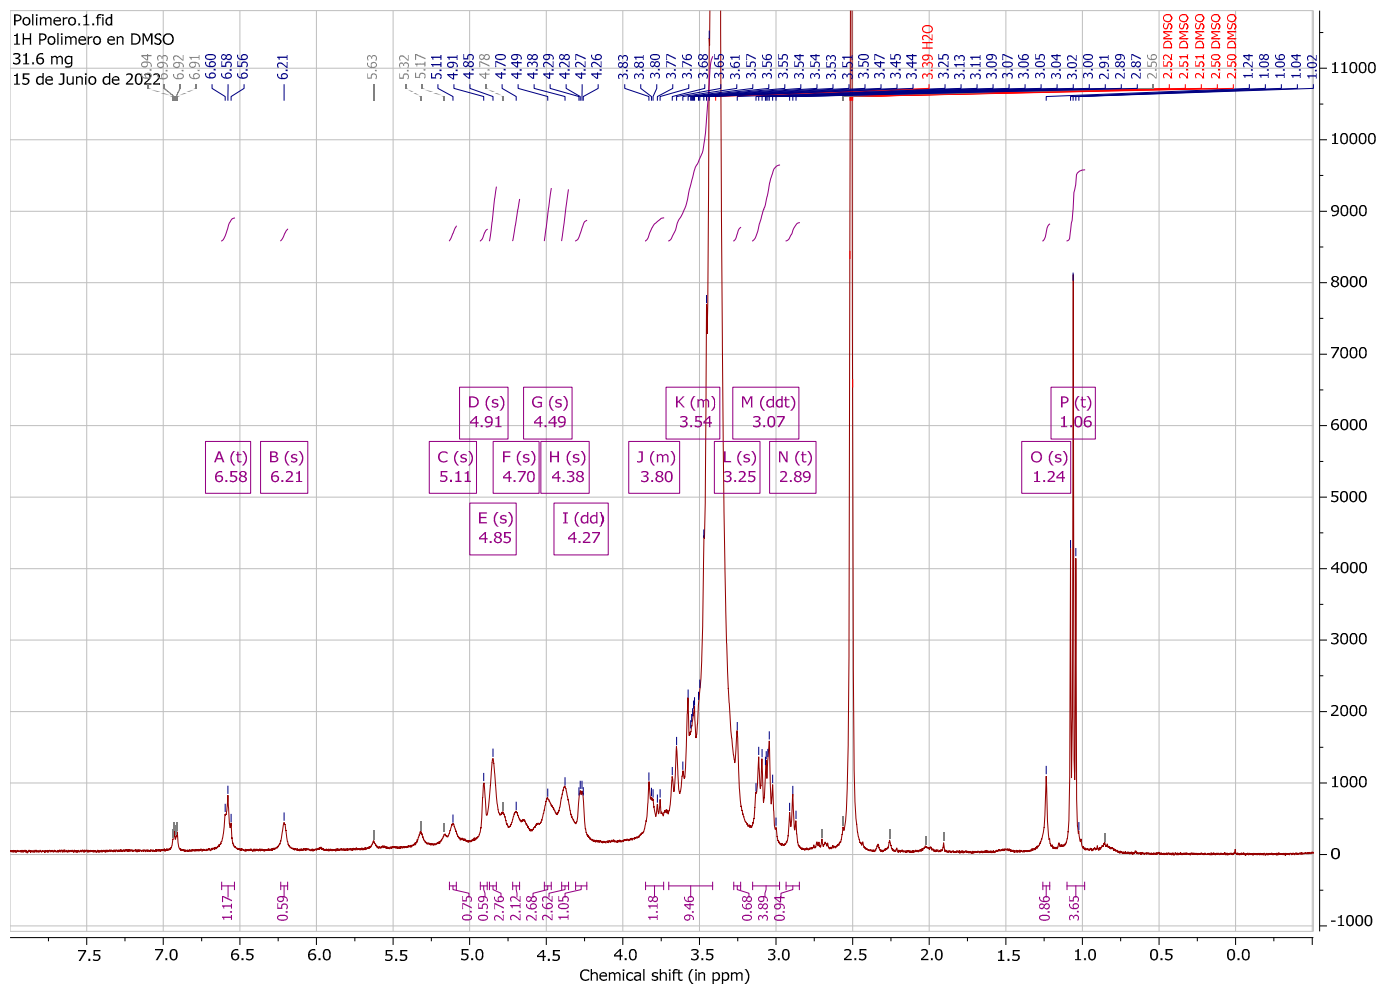

**Figure S1.**  $^1\text{H}$  NMR spectrum (in  $\text{DMSO-}d_6$ ) of a mucilage sample extracted from OFI fruit peels.

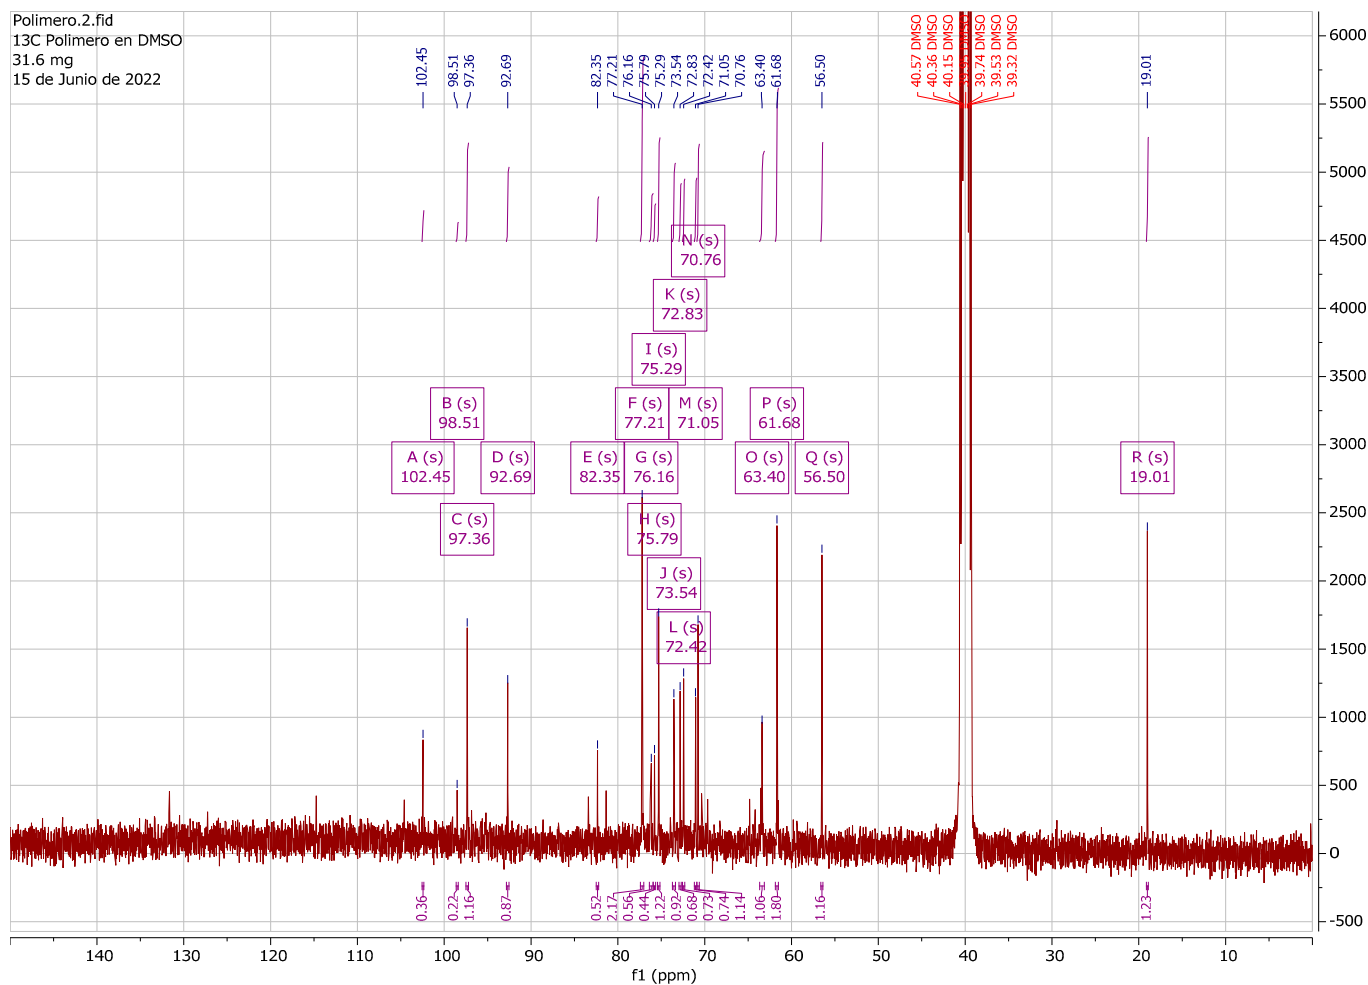

**Figure S2.** <sup>13</sup>C NMR spectrum (in DMSO-*d*<sub>6</sub>) of a mucilage sample extracted from OFI fruit peels.

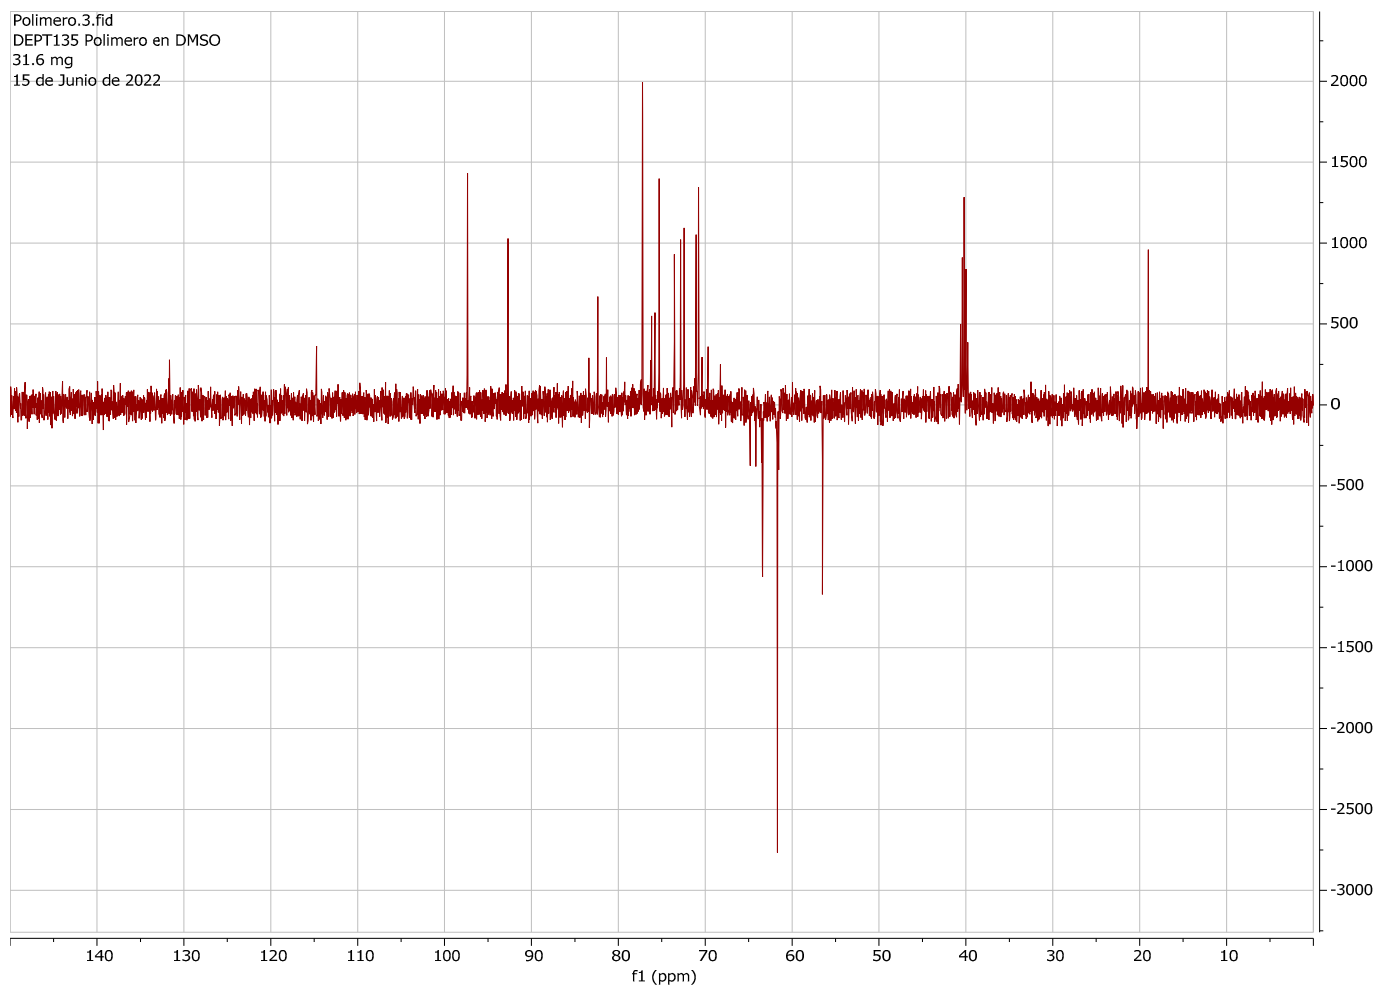

**Figure S3.** DEPT/ $^{13}\text{C}$  NMR spectrum (in  $\text{DMSO-}d_6$ ) of a mucilage sample extracted from OFI fruit peels.

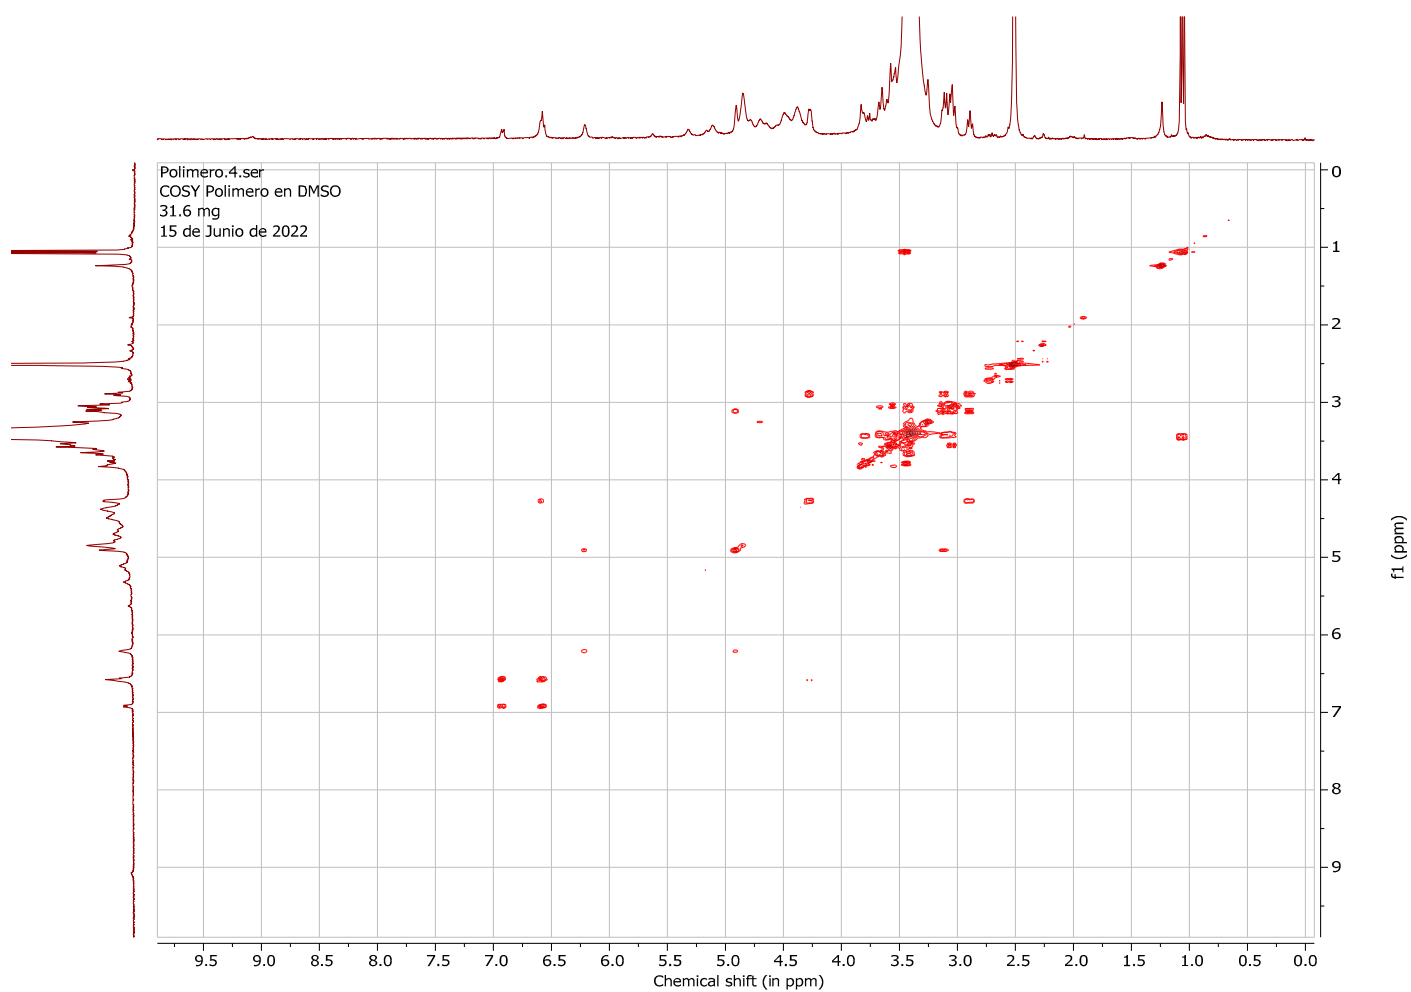

**Figure S4.**  $^1\text{H}$ - $^1\text{H}$  COSY NMR spectrum (in  $\text{DMSO-}d_6$ ) of a mucilage sample extracted from OFI fruit peels.

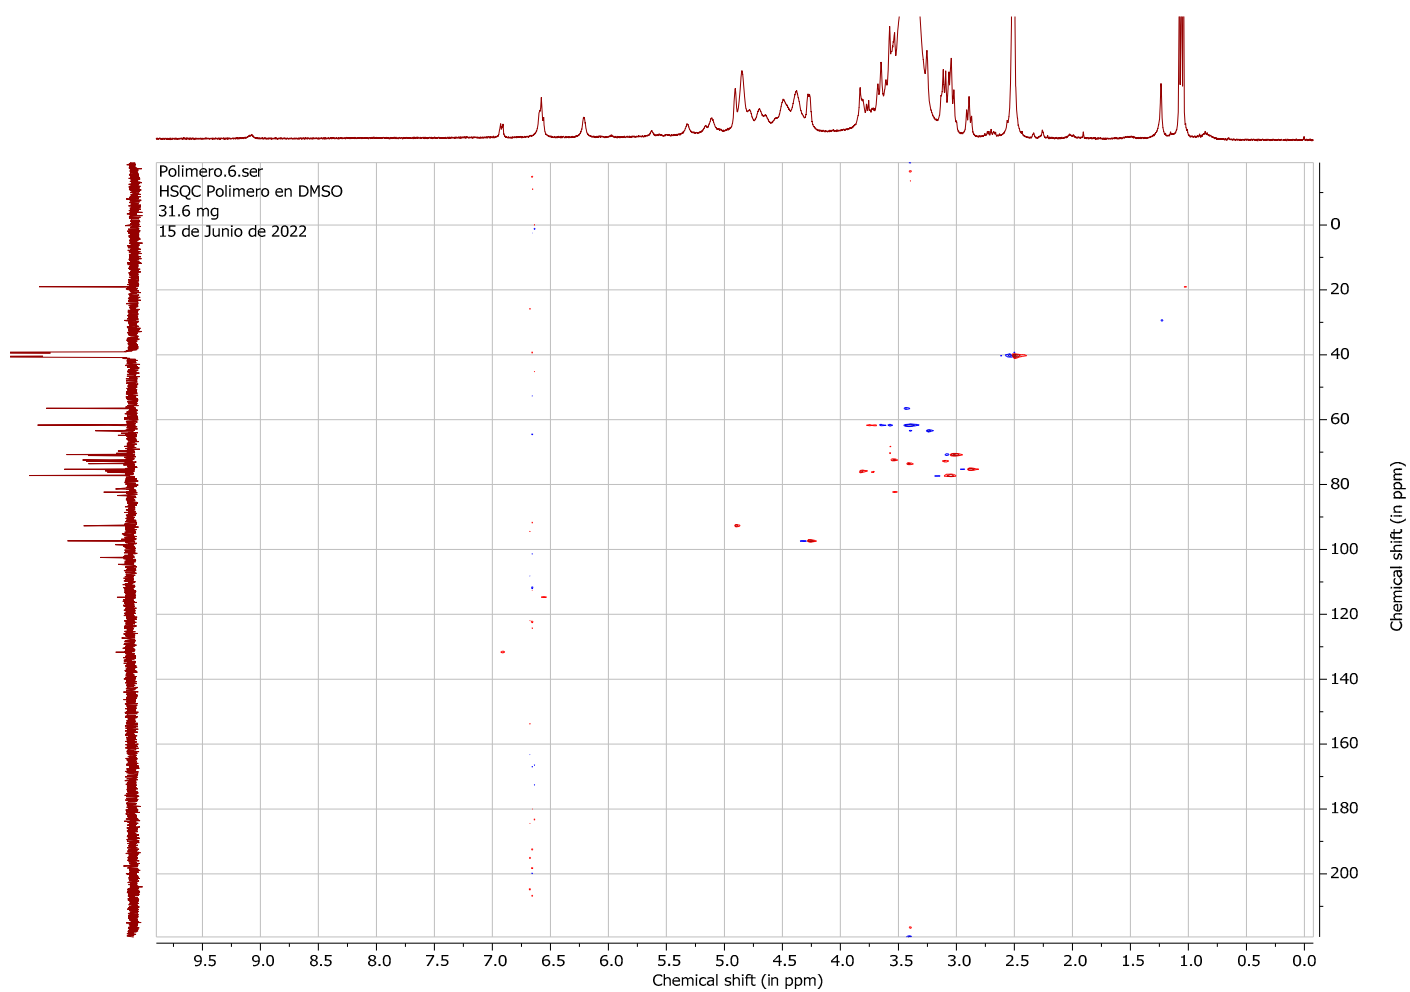

**Figure S5.** HSQC 2D-NMR spectrum (in DMSO-*d*<sub>6</sub>) of a mucilage sample extracted from OFI fruit peels.

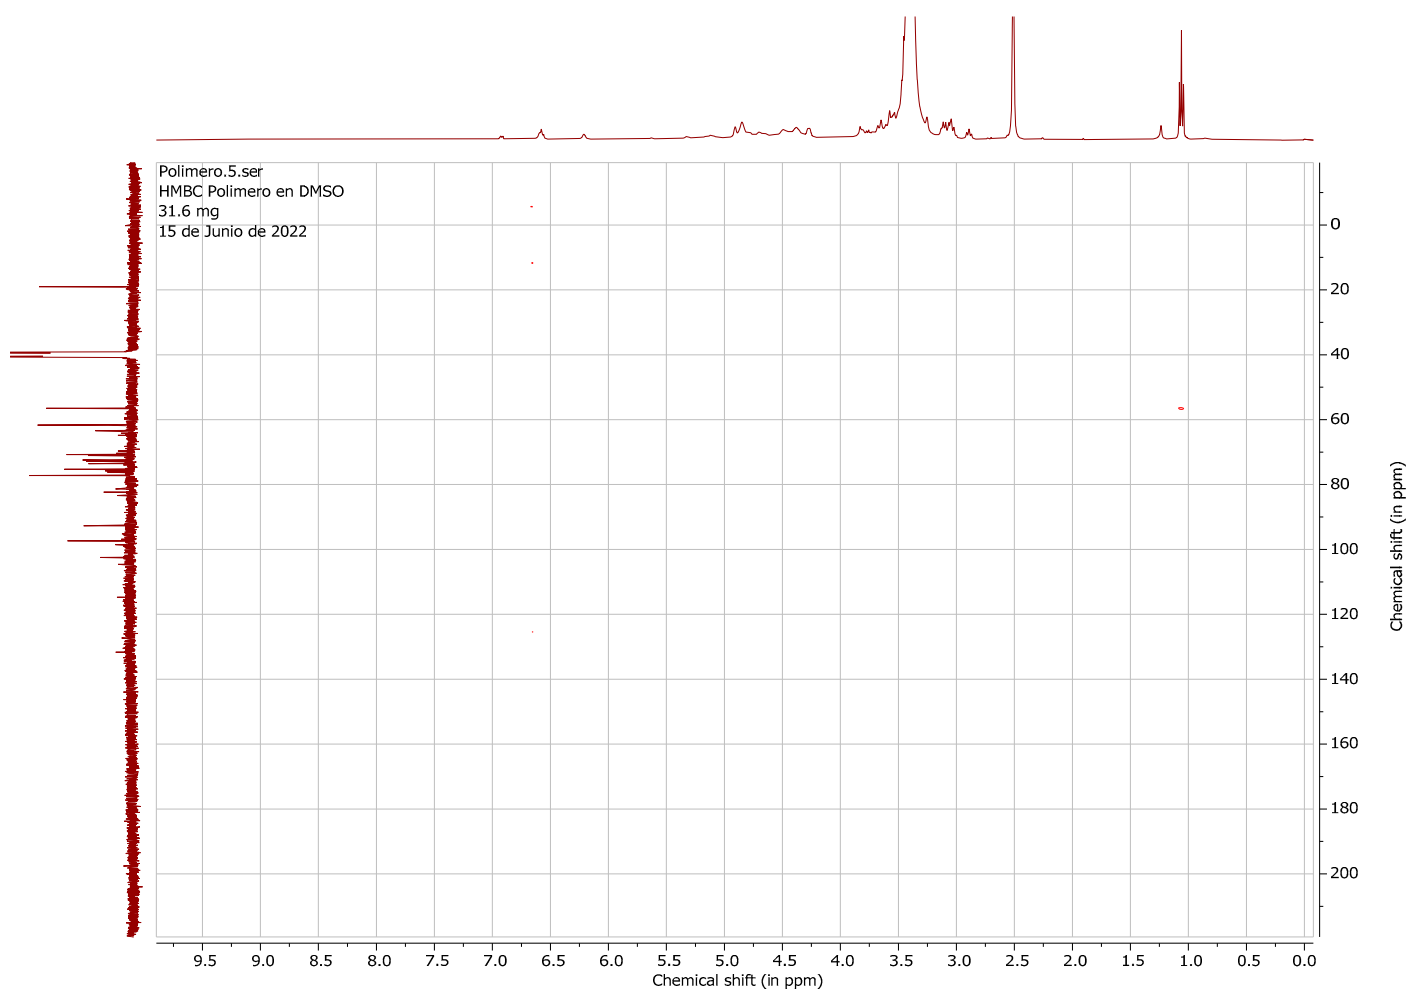

**Figure S6.** HMBC 2D-NMR spectrum (in DMSO-*d*<sub>6</sub>) of a mucilage sample extracted from OFI fruit peels.
